# Supplementary material
Source: PubMed Central journal article supplement (PMC8092444)

**A.**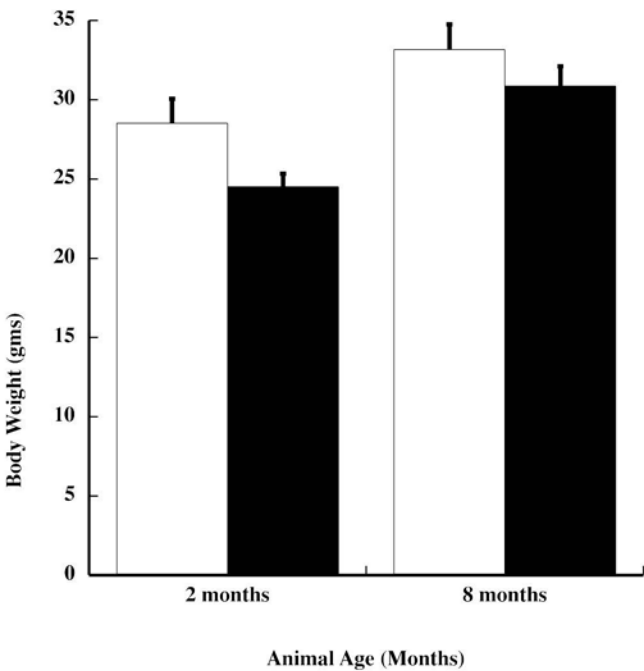**B.**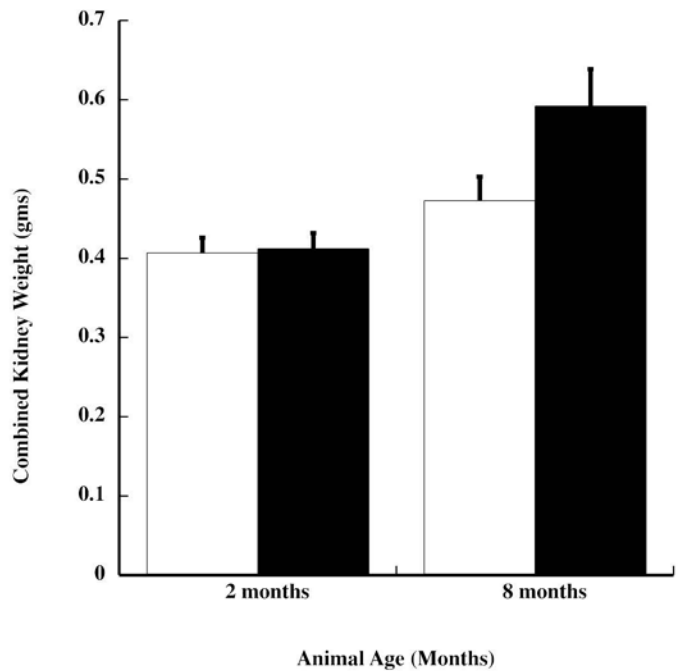**C.**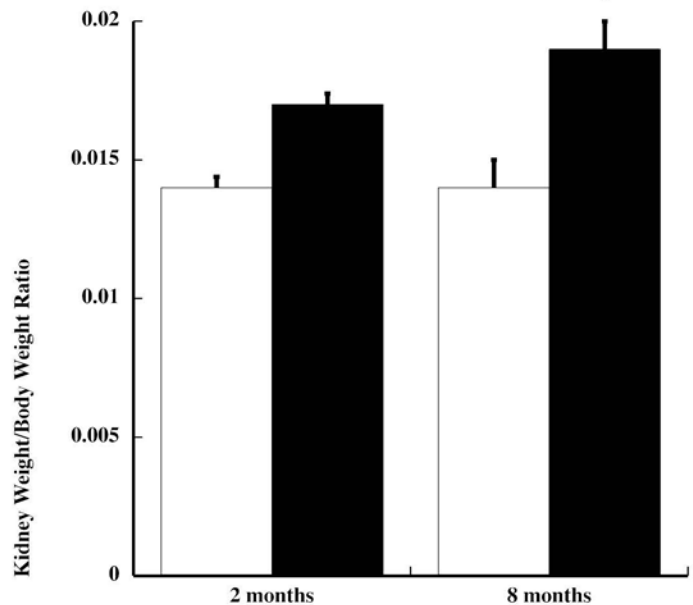

Supplement: NIHMS734093-supplement-Supplemental_Figure_1.pdf [file NIHMS734093-supplement-Supplemental_Figure_1.pdf]
